# Supplementary material for: Nonparametric Simulation of Signal Transduction Networks with Semi-Synchronized Update
Source: PLoS One. 2012 Jun 21;7(6):e39643. doi: 10.1371/journal.pone.0039643 (PMC3380921; doi:10.1371/journal.pone.0039643)
Supplement: Table S1 — Simulation results of activity levels of four signaling proteins in signaling network of EGFR/IGF-1R/IR under various perturbations with comparison with experimental results. (A) The proportion of MAPK1,2, JNK, AKT, and p70s6K molecules in active forms in response to the activation of EGFR, IGF-1R, and IR. (B) Activation of MAPK1,2, JNK, AKT, and p70s6K in response to co-stimulation of EGFR/IR and IGF-1R/EGFR/IR. (XLSX) [file pone.0039643.s001.xlsx]

## Sheet: Table S1
Table S1. (A-C) The proportion of active form of MAPK, Jnk, Akt1 and p70S6K in response to the activation of EGFR, IGF-1R and IR, and (D-E) Co-stimulation of EGFR/IR, and EGFR/IR/IGF-1R. The experimental data were acquired from the previous study (Zielinski et al., 2009).
Target	MAPK1,2		Jnk		Akt1		P70S6K
Percent	Experimental	Simulation	Experimental	Simulation	Experimental	Simulation	Experimental	Simulation
A
Ligand: EGFR
25	0.0479	0.0648666	0.0151	0.00573487	0.8127	0.0580215	0.0873	0.022264
50	0.0961	0.0862603	0.0168	0.00866022	1	0.0893754	0.0934	0.0258541
75	0.0989	0.0968348	0.018	0.0104895	1	0.110275	0.0926	0.027463
100	0.1331	0.103135	0.0198	0.0117739	1	0.125727	0.0914	0.0284165
B
Ligand: IGF-1R
25	0.088	0.051296	0.012	0.0253338	0.7086	0.0927152	0.063	0.025131
50	0.0517	0.0802652	0.0106	0.0411866	0.5364	0.137465	0.0621	0.0315601
75	0.0649	0.0992046	0.0139	0.0522539	1	0.163817	0.0655	0.0345821
100	0.0684	0.112664	0.0116	0.0604979	1	0.181186	0.0597	0.0363577
C
Ligand: IR
25	0.01011	0.0284933	0.0172	0.0256024	0.9431	0.0647952	0.0589	0.0647952
50	0.0849	0.0431472	0.0167	0.0421685	0.3837	0.0985704	0.062	0.0985704
75	0.0765	0.0519988	0.014	0.0538719	0.7182	0.11918	0.0573	0.11918
100	0.0508	0.0578952	0.098	0.0626143	0.8131	0.133018	0.0592	0.133018
D
Ligand: IR & (EGFR 100% Saturated)
25	0.1643	0.0972107	0.0169	0.0343565	1	0.18102	0.0926	0.0341745
50	0.1448	0.0979991	0.0148	0.0481233	1	0.194314	0.0953	0.0354602
75	0.1643	0.0986093	0.0159	0.0582613	1	0.203116	0.0971	0.0362798
100	0.1686	0.0990947	0.0154	0.0660432	1	0.20936	0.0981	0.0368466
E
Ligand: EGFR & (IR & IGF-1R 100% Saturated)
25	0.12	0.137233	0.012	0.0978576	1	0.249349	0.092	0.0431721
50	0.2022	0.140911	0.0106	0.0983228	1	0.260568	0.0937	0.0435374
75	0.1533	0.143552	0.0139	0.0987021	1	0.269824	0.0926	0.043805
100	0.1647	0.13769	0.0116	0.0103877	1	0.277635	0.0839	0.0422206

## Sheet: Signaling network of EGF IGF IR
1	22	1	4EBP-1		4EBP-1	eIF4E	-1
3	53	2	Actin		Akt	PDE3B	1
3	6	3	Akt		Akt	BAD	-1
3	26	4	APS		Akt	FKHR	-1
3	31	5	ARF		Akt	GSK-3	-1
3	36	6	BAD		Akt	IRS	-1
3	82	7	bcl-2		Akt	tsc-1/2	-1
4	9	8	beta-Arr1		APS	c-cbl	1
6	7	9	c-cbl		BAD	bcl-2	-1
8	39	10	c-fos		beta-Arr1	MAPK1,2	1
8	56	11	c-Jun		beta-Arr1	PI3K-Ia	1
12	3	12	c-Src		c-Src	Akt	1
13	58	13	Ca++		Ca++	PKC	1
14	57	14	cAMP		cAMP	PKA	1
15	20	15	Cbl		Cbl	EGFR	-1
15	59	16	CREB		Cbl	PLCgamma	1
16	37	17	DAG		CREB	IRS-2	1
17	58	18	eEF2K		DAG	PKC	1
19	20	19	EGF		EGF	EGFR	1
20	12	20	EGFR		EGFR	c-Src	1
20	15	21	eIF2B		EGFR	Cbl	1
20	24	22	eIF4E		EGFR	ErbB2	1
20	25	23	elk-1		EGFR	ErbB3	1
20	28	24	ErbB2		EGFR	Grb2	1
20	44	25	ErbB3		EGFR	Nck	1
20	59	26	FKHR		EGFR	PLCgamma	1
20	66	27	GAB1		EGFR	RasGAP1	1
20	72	28	Grb2		EGFR	Shc	1
20	78	29	Grb7		EGFR	STAT	1
20	83	30	GRP1		EGFR	Vav	1
24	12	31	GSK-3		ErbB2	c-Src	1
24	28	32	IGF-1		ErbB2	Grb2	1
24	29	33	IGF-1R		ErbB2	Grb7	1
24	59	34	Ins		ErbB2	PLCgamma	1
24	66	35	IR		ErbB2	RasGAP1	1
24	72	36	IRS		ErbB2	Shc	1
25	49	37	IRS-2		ErbB3	p85-PI3K	1
27	49	38	JNK		GAB1	p85-PI3K	1
28	15	39	MAPK1,2		Grb2	Cbl	1
28	27	40	MAPK1,2K		Grb2	GAB1	1
28	76	41	MSK1		Grb2	SOS	1
28	77	42	MSK2		Grb2	Spry	1
30	5	43	N-WASP		GRP1	ARF	1
31	21	44	Nck		GSK-3	eIF2B	-1
32	33	45	p110-Ia		IGF-1	IGF-1R	1
33	8	46	p21		IGF-1R	beta-Arr1	1
33	36	47	p55gamma		IGF-1R	IRS	1
33	37	48	p70S6K		IGF-1R	IRS-2	1
33	72	49	p85-PI3K		IGF-1R	Shc	1
34	35	50	p85alpha		Ins	IR	1
35	4	51	p85beta		IR	APS	1
35	36	52	p90RSK		IR	IRS	1
35	37	53	PDE3B		IR	IRS-2	1
35	72	54	PDK1		IR	Shc	1
36	28	55	PI3/4/5P3		IRS	Grb2	1
36	38	56	PI3K-Ia		IRS	JNK	1
36	47	57	PKA		IRS	p55gamma	1
36	50	58	PKC		IRS	p85alpha	1
36	51	59	PLCgamma		IRS	p85beta	1
36	74	60	PP2A		IRS	Shp2	1
37	50	61	PTEN		IRS-2	p85alpha	1
37	51	62	PTP1B		IRS-2	p85beta	1
38	11	63	Rac		JNK	c-Jun	1
38	36	64	Raf-1		JNK	IRS	-1
38	37	65	Ras		JNK	IRS-2	-1
39	10	66	RasGAP1		MAPK1,2	c-fos	1
39	23	67	Rho		MAPK1,2	elk-1	1
39	41	68	RhoGAP-B		MAPK1,2	MSK1	1
39	42	69	ROCK		MAPK1,2	MSK2	1
39	48	70	RSK		MAPK1,2	p70S6K	1
39	52	71	S6		MAPK1,2	p90RSK	1
39	70	72	Shc		MAPK1,2	RSK	1
39	36	73	SHIP		MAPK1,2	IRS	-1
39	76	74	Shp2		MAPK1,2	SOS	-1
40	39	75	SOCS		MAPK1,2K	MAPK1,2	1
41	16	76	SOS		MSK1	CREB	1
42	16	77	Spry		MSK2	CREB	-1
43	2	78	STAT		N-WASP	Actin	1
44	43	79	TNF		Nck	N-WASP	1
45	55	80	TNF-R1		p110-Ia	PI3/4/5P3	1
47	45	81	TOR		p55gamma	p110-Ia	1
48	71	82	tsc-1/2		p70S6K	S6	1
49	56	83	Vav		p85-PI3K	PI3K-Ia	1
50	45				p85alpha	p110-Ia	1
51	45				p85beta	p110-Ia	1
52	18				p90RSK	eEF2K	1
53	14				PDE3B	cAMP	-1
54	3				PDK1	Akt	1
54	48				PDK1	p70S6K	1
54	58				PDK1	PKC	1
55	3				PI3/4/5P3	Akt	1
55	27				PI3/4/5P3	GAB1	1
55	30				PI3/4/5P3	GRP1	1
55	38				PI3/4/5P3	JNK	1
55	54				PI3/4/5P3	PDK1	1
55	58				PI3/4/5P3	PKC	1
55	59				PI3/4/5P3	PLCgamma	1
56	12				PI3K-Ia	c-Src	1
56	55				PI3K-Ia	PI3/4/5P3	1
57	16				PKA	CREB	1
58	48				PKC	p70S6K	1
58	20				PKC	EGFR	-1
59	13				PLCgamma	Ca++	1
59	17				PLCgamma	DAG	1
60	8				PP2A	beta-Arr1	1
61	55				PTEN	PI3/4/5P3	-1
62	35				PTP1B	IR	-1
63	2				Rac	Actin	1
64	40				Raf-1	MAPK1,2K	1
65	64				Ras	Raf-1	1
67	2				Rho	Actin	1
67	69				Rho	ROCK	1
68	67				RhoGAP-B	Rho	-1
69	36				ROCK	IRS	-1
70	10				RSK	c-fos	1
72	28				Shc	Grb2	1
73	55				SHIP	PI3/4/5P3	-1
75	35				SOCS	IR	-1
75	36				SOCS	IRS	-1
76	65				SOS	Ras	1
77	28				Spry	Grb2	-1
78	46				STAT	p21	1
79	80				TNF	TNF-R1	1
80	38				TNF-R1	JNK	1
81	48				TOR	p70S6K	1
81	1				TOR	4EBP-1	-1
82	81				tsc-1/2	TOR	-1
83	63				Vav	Rac	1
83	67				Vav	Rho	1
