# Supplementary material for: Nonparametric Simulation of Signal Transduction Networks with Semi-Synchronized Update
Source: PLoS One. 2012 Jun 21;7(6):e39643. doi: 10.1371/journal.pone.0039643 (PMC3380921; doi:10.1371/journal.pone.0039643)
Supplement: Table S3 — The simulation results of activity levels of 10 signaling proteins in the Huh7 cell line under various perturbations, in comparison with experimental results. (XLSX) [file pone.0039643.s003.xlsx]

## Sheet: Huh7 
Table S3. The proportion of active form of 10 signaling proteins in response to the activation of 5 ligands and 3 different inhibitors.
		CREB	CREB	ERK	ERK	HistH3	HistH3	HSP27	HSP27	p90	p90	IkB	IkB	JNK	JNK	MEK	MEK	p38	p38	p70s6	p70s6
Effectors	Inhibitors	Exp	Sim	Exp	Sim	Exp	Sim	Exp	Sim	Exp	Sim	Exp	Sim	Exp	Sim	Exp	Sim	Exp	Sim	Exp	Sim
IL1b	None	0.0183112	0.0188366	0.0240484	0.0587433	0.0846117	0.0904461	0.167241	0.125463	0.0290143	0.0881215	0.0975669	0.0996017	0.109116	0.198582	0.0225087	0.0109631	0.0743139	0.0716546	0.0103749	0.0141738
	cMETi	0.236539	0.194661	0.0530394	0.051912	0.257205	0.0881437	0.0986634	0.123313	0.0716751	0.0830409	0.0970622	0.0105235	0.143384	0.174551	0.13167	0.0981481	0.0992933	0.0653068	0.117065	0.122534
	MEKi	0.130582	0.244414	0.082937	0.09654	0.161425	0.102531	0.169607	0.157544	0.0533731	0.0143454	0.0935686	0.122534	0.10483	0.194565	0	0	0.0871964	0.0711098	0.10433	0.17111
	PI3Ki	0.263727	0.198712	0.039146	0.0597797	0.0932452	0.091827	0.0938375	0.141917	0.01659	0.092784	0.0998117	0.129285	0.104614	0.187743	0.0918567	0.0970254	0.0962611	0.065465	0.0752919	0.0173143
TGFa	None	0.40269	0.243287	0.0984194	0.102353	0.0705687	0.0908085	0.173731	0.0996682	0.192655	0.182686	0.130384	0.0947428	0.0326221	0.079786	0.0980569	0.199601	0.0690004	0.0241184	0.194635	0.280378
	cMETi	0.0991547	0.191534	0.0989334	0.11092	0.223916	0.0699313	0.166951	0.0966439	0.208528	0.161025	0.135873	0.0955115	0.141279	0.0743729	0.0979824	0.0194794	0.0724133	0.0265331	0.29612	0.326525
	MEKi	0.036	0.0303755	0.00123	0.0016267	0.0781973	0.110572	0.0189013	0.0126326	0.00224	0.00237789	0.0634974	0.0878172	0.048799	0.0765487	0	0	0.0258673	0.0249832	0.418933	0.331651
	PI3Ki	0.0782371	0.017146	0.0241142	0.010905	0.0315521	0.081186	0.16901	0.109073	0.288703	0.164106	0.0925675	0.0103422	0.166961	0.089892	0.223464	0.219921	0.0488992	0.0274123	0.507948	0.355606
Her	None	0.13192	0.0891185	0.0320312	0.0210192	0.0581765	0.0357201	0.0593413	0.0463919	0.0133382	0.0278054	0.0475259	0.0971389	0.0577341	0.0817601	0.0375385	0.0363522	0.0715123	0.0206421	0.0813112	0.18216
	cMETi	0.173164	0.082315	0.0250828	0.0218487	0.0221415	0.0311375	0.119867	0.0477927	0.0272404	0.0328705	0.0144687	0.0100611	0.163258	0.0852049	0.0859152	0.0319185	0.17615	0.284717	0.0110299	0.0163914
	MEKi	0.0456285	0.0303755	0.183599	0.16267	0.0709676	0.110572	0.181975	0.126326	0.145172	0.237789	0.0657692	0.0878172	0.0633257	0.0765487	0	0	0.231819	0.249832	0.0865761	0.0331651
	PI3Ki	0.0116816	0.0135243	0.215117	0.272237	0.0168241	0.0424981	0.0162277	0.054874	0.0266243	0.0425122	0.0220769	0.0122729	0.0135323	0.0941582	0.0722547	0.0447075	0.0296924	0.0322125	0.0151644	0.0240016
INS	None	0.00617366	0.00783599	0.0250356	0.0128289	0.031658	0.0202428	0.0359354	0.0425368	0.0162945	0.020502	0.0424496	0.0812054	0.0332644	0.068974	0.0282235	0.025811	0.0224479	0.0217466	0.0708535	0.141169
	cMETi	0.022463	0.0677265	0.0896047	0.071206	0.0519044	0.0237332	0.060443	0.033877	0.0317151	0.0279552	0.0184541	0.00900114	0.0759227	0.0730801	0.024895	0.0251916	0.0830393	0.0201384	0.0191516	0.0172567
	MEKi	0.00533345	0.0096903	0.0163472	0.0305585	0.039989	0.0372792	0.0372176	0.0545185	0.0198251	0.0387691	0.0138036	0.0084146	0.012127	0.0081192	0	0	0.0175224	0.0248592	0.00850577	0.0133951
	PI3Ki	0.00701011	0.0128609	0.0170924	0.0253927	0.0382199	0.0495924	0.0621497	0.053502	0.0278605	0.0369747	0.00717155	0.0138308	0.0126696	0.00935696	0.0589349	0.041736	0.0143636	0.0271197	0.0094169	0.0210636
TNFa	None	0.0182383	0.0122703	0.00442463	0.00375453	0.0669666	0.11748	0.34261	0.185852	0.00515018	0.00572973	0.0904374	0.0931212	0.133299	0.116204	0.011891	0.00608597	0.127336	0.155287	0.00701903	0.0087932
	cMETi	0.141185	0.142733	0.0637127	0.00533916	0.100516	0.113816	0.475558	0.225821	0.00693547	0.00803595	0.0980388	0.0105082	0.275136	0.132134	0.0145287	0.00858199	0.00879612	0.0171767	0.117434	0.0996193
	MEKi	0.0308905	0.0159848	0.00899142	0.00826834	0.0734142	0.105637	0.271295	0.193754	0.0260063	0.0131642	0.0443284	0.0110183	0.03017	0.0141946	0	0	0.123378	0.166118	0.0155589	0.0106269
	PI3Ki	0.0254052	0.0198712	0.0242576	0.0597797	0.0725442	0.091827	0.229324	0.141917	0.0220962	0.0092784	0.0970462	0.129285	0.00821287	0.0187743	0.0248636	0.00970254	0.143764	0.065465	0.23689	0.173143
	Exp.is abbreviation for experimental results
	Sim. is abbreviation for simulation results

## Sheet: Signaling network
1	IL6		IL6	IL6R	1		1	2	1
2	IL6R		IL6R	JAK2	1		2	3	1
3	JAK2		JAK2	STAT3	1		3	4	1
4	STAT3		TGFA	REBB1	1		5	6	1
5	TGFA		REBB1	REBB11	1		6	7	1
6	REBB1		REBB1	REBB12	1		6	8	1
7	REBB11		REBB11	GRB2	1		7	9	1
8	REBB12		REBB12	GRB2	1		8	9	1
9	GRB2		REBB12	SHC	1		8	10	1
10	SHC		REBB12	P70S6	1		8	11	1
11	P70S6		GRB2	SOS	1		9	12	1
12	SOS		SHC	SRB2	1		10	13	1
13	SRB2		SOS	RAS	1		12	14	1
14	RAS		RAS	RAF1	1		14	15	1
15	RAF1		RAS	PI3K	1		14	26	1
16	MEK		RAF1	MEK	1		15	16	1
17	ERK		MEK	ERK	1		16	17	1
18	p90		MEK	p90	1		16	18	1
19	PARK		ERK	P70S6	1		17	11	1
20	MSK		ERK	PARK	1		17	19	1
21	HSP27		ERK	MSK	1		17	20	1
22	CREB		ERK	cJUN	-1		17	62	-1
23	HistH3		p90	CREB	1		18	22	1
24	HGF		PARK	HSP27	1		19	21	1
25	CMET		MSK	CREB	1		20	22	1
26	PI3K		MSK	HistH3	1		20	23	1
27	PIP3		CREB	IRS1T	1		22	45	1
28	RAC		HGF	CMET	1		24	25	1
29	PDK1		CMET	GRB2	1		25	9	1
30	MAP3K		CMET	PI3K	1		25	26	1
31	MKK4		PI3K	PIP3	1		26	27	1
32	IKK		PI3K	RAC	1		26	28	1
33	MKK7		PIP3	PDK1	1		27	29	1
34	p38		RAC	MAP3K	1		28	30	1
35	JNK		PDK1	P70S6	1		29	11	1
36	IKB		PDK1	AKT	1		29	59	1
37	mTOR		MAP3K	MEK	1		30	16	1
38	PRAK		MAP3K	MKK4	1		30	31	1
39	HER		MAP3K	MKK4	1		30	31	1
40	ERBB34		MAP3K	IKK	1		30	32	1
41	ERBB234		MAP3K	MKK7	1		30	33	1
42	INS		MKK4	p38	1		31	34	1
43	IRB		MKK4	JNK	1		31	35	1
44	IGFR		MKK4	JNK	1		31	35	1
45	IRS1T		IKK	IKB	1		32	36	1
46	TNFA		MKK7	JNK	1		33	35	1
47	TNFR		p38	MSK	1		34	20	1
48	TRAF2		p38	PRAK	1		34	38	1
49	MAP3K7		JNK	cJUN	1		35	62	1
50	ASK1		IKB	mTOR	1		36	37	1
51	NIK		mTOR	P70S6	1		37	11	1
52	MKK3		mTOR	RS1S	1		37	54	1
53	MKK6		PRAK	HSP27	1		38	21	1
54	RS1S		HER	ERBB34	1		39	40	1
55	IL1B		ERBB34	ERBB234	1		40	41	1
56	IL1BR		ERBB234	SHC	1		41	10	1
57	TRAF6		ERBB234	PI3K	1		41	26	1
58	SITPEC		INS	IRB	1		42	43	1
59	AKT		INS	IGFR	1		42	44	1
60	GSK3		IRB	SHC	1		43	10	1
61	Cot		IRB	IRS1T	1		43	45	1
62	cJUN		IGFR	SHC	1		44	10	1
			IGFR	IRS1T	1		44	45	1
			IRS1T	PI3K	1		45	26	1
			TNFA	TNFR	1		46	47	1
			TNFR	SHC	1		47	10	1
			TNFR	TRAF2	1		47	48	1
			TRAF2	MAP3K7	1		48	49	1
			TRAF2	ASK1	1		48	50	1
			MAP3K7	MKK4	1		49	31	1
			MAP3K7	NIK	1		49	51	1
			MAP3K7	MKK3	1		49	52	1
			MAP3K7	MKK6	1		49	53	1
			NIK	IKK	1		51	32	1
			MKK3	PARK	1		52	19	1
			MKK3	MKK7	1		52	33	1
			MKK3	p38	1		52	34	1
			MKK6	p38	1		53	34	1
			IL1B	IL1BR	1		55	56	1
			IL1BR	TRAF6	1		56	57	1
			TRAF6	SITPEC	1		57	58	1
			SITPEC	MAP3K	1		58	30	1
			AKT	mTOR	1		59	37	1
			AKT	GSK3	1		59	60	1
			AKT	Cot	1		59	61	1
			Cot	IKK	1		61	32	1
			cJUN	CREB	1		62	22	1
